# Supplementary material for: Terminally differentiated osteoclasts organize centrosomes into large clusters for microtubule nucleation and bone resorption
Source: PubMed Central journal article supplement — Mol Biol Cell. 2022 Jun 13;33(8):ar68. doi: 10.1091/mbc.E22-03-0098 (PMC9635281; doi:10.1091/mbc.e22-03-0098), 2022-06-13
Supplement: mbc-33-ar68-s001.pdf [file mbc-33-ar68-s001.pdf]

# Supplementary Materials

Molecular Biology of the Cell

Philip *et al.*

## SUPPLEMENTARY FIGURE LEGENDS

### Supplemental Figure S1

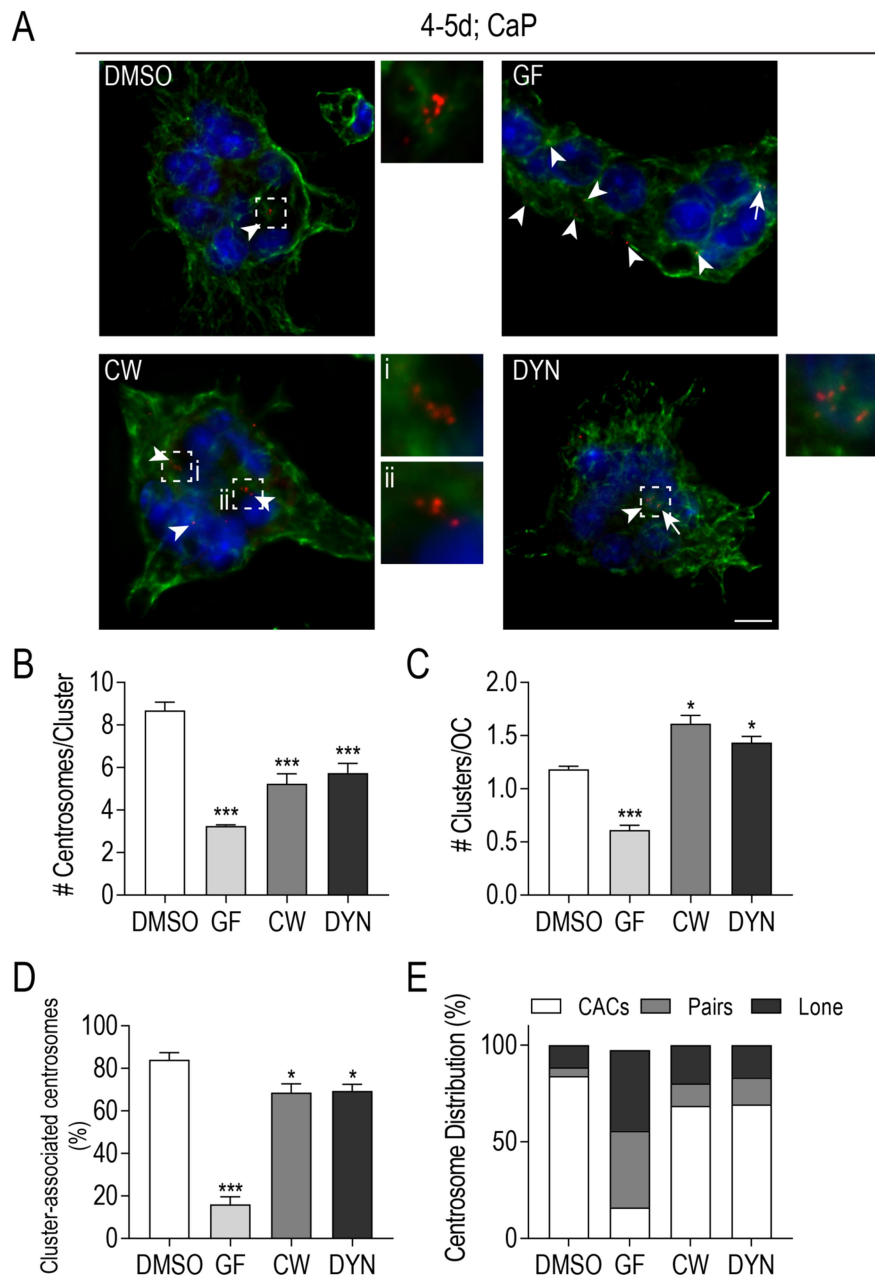

Supplementary Figure S1. **Microtubule dynamicity, KIFC1 and dynein contribute to centrosome clustering in resorbing osteoclasts.** RAW-derived osteoclasts were lifted and replated on CaP prior to treatment with centrosome declustering agents: 40  $\mu$ M Griseofulvin (GF), 80  $\mu$ M CW069 (CW), and 175  $\mu$ M Dynarrestin (DYN). (A) Representative images of osteoclasts fixed 24 hours post-treatment and stained with DAPI (blue), tubulin (green), and cenexin (red). White arrows indicate

centrosome pairs and arrowheads indicate lone centrosomes. Centrosome clusters are shown in dashed box insets. Scale bars = 10  $\mu$ m. (B, C) The average number of centrosomes per cluster (B) and the average number of clusters/cell (C) after treatment with declustering drugs was calculated from 4 independent experiments ( $n = 40$ ). Significance relative to DMSO was determined through a one-way ANOVA followed by Dunnett's multiple comparison (\*  $P < 0.05$ ; \*\*\*  $P < 0.001$ ) (D) % cluster-associated centrosomes after treatment with individual declustering drugs from three independent experiments. Significance relative to DMSO was determined through a one-way ANOVA followed by Dunnett's multiple comparison (\*,  $P < 0.05$ ). Each graph displays mean  $\pm$  SEM (B-D). (E) Centrosome distribution (%) in clusters, pairs or individually after treatment with individual declustering drugs from 4 independent experiments.
